# Supplementary material for: Non-Destructive Classification of Diversely Stained Capsicum annuum Seed Specimens of Different Cultivars Using Near-Infrared Imaging Based Optical Intensity Detection
Source: MDPI journal article supplement (doi:10.3390/s18082500), 2018-08-01
Supplement: s1 [file s1]

# Non-Destructive Classification of Diversely Stained *Capsicum annum* Seed Specimens of Different Cultivars Using Near-Infrared Imaging Based Optical Intensity Detection

Jyothsna Konkada Manattayil <sup>1†</sup>, Naresh Kumar Ravichandran <sup>2†</sup>, Ruchire Eranga Wijesinghe <sup>3</sup>, Muhammad Faizan Shirazi <sup>4</sup>, Seung-Yeol Lee <sup>5</sup>, Pilun Kim <sup>6</sup>, Hee-Young Jung <sup>5,\*</sup>, Mansik Jeon <sup>2,\*</sup> and Jeehyun Kim <sup>2</sup>

<sup>1</sup> Department of Electronics and Communication, Faculty of Engineering, Christ (Deemed to be University), Bangalore 560029, India; jyothsna.km@mtech.christuniversity.in

<sup>2</sup> Kyungpook National University, College of IT Engineering, School of Electronics Engineering, 80, Daehak-ro, Buk-gu, Daegu 41566, Korea; nareshr.9169@gmail.com (N.K.R.); jeehk@knu.ac.kr (J.K.)

<sup>3</sup> Department of Biomedical Engineering, College of Engineering, Kyungil University, 50, Gamasil-gil, Hayang-eup, Gyeongsan-si, Gyeongsangbuk-do 38428, Korea; eranga@kiu.kr

<sup>4</sup> Center of Medical Physics and Biomedical Engineering, Medical University of Vienna, Waehringer Guertel 18-20, 1090 Vienna, Austria; muhammad.shirazi@meduniwien.ac.at (M.F.S.)

<sup>5</sup> School of Applied Biosciences, Kyungpook National University, 80, Daehak-ro, Buk-gu, Daegu 41566, Korea; leesy1985@gmail.com

<sup>6</sup> Institute of Biomedical Engineering, Kyungpook National University, 680, Gukchaebosang-ro, Jung-gu, Daegu 41944, Korea; pukim@knu.ac.kr

\* Correspondence: heeyoung@knu.ac.kr (H.-Y.J.); msjeon@knu.ac.kr (M.J.); Tel.: +82-53-950-7846 (M.J.)

† These authors contributed equally to this work.

**Table S1.** Normalized Intensity observed at different depths for all seeds in *C. annum* group (control).

| Normalized Intensity Observed at different depths (a.u.) |                    |            |            |            |            |            |
|----------------------------------------------------------|--------------------|------------|------------|------------|------------|------------|
|                                                          |                    | Depth (μm) |            |            |            |            |
|                                                          |                    | 100        | 200        | 300        | 400        | 500        |
| C. annum (control)                                       | seed1              | 0.5038     | 0.3344     | 0.238      | 0.1856     | 0.1439     |
|                                                          | seed2              | 0.4898     | 0.3251     | 0.2295     | 0.2013     | 0.1614     |
|                                                          | seed3              | 0.4983     | 0.3127     | 0.2199     | 0.1731     | 0.1421     |
|                                                          | seed4              | 0.5258     | 0.3445     | 0.2477     | 0.1911     | 0.1791     |
|                                                          | seed5              | 0.4756     | 0.2972     | 0.2206     | 0.1741     | 0.1515     |
|                                                          | seed6              | 0.4744     | 0.3037     | 0.2207     | 0.1685     | 0.1513     |
|                                                          | seed7              | 0.4431     | 0.3588     | 0.3429     | 0.2242     | 0.1938     |
|                                                          | seed8              | 0.4393     | 0.3141     | 0.2259     | 0.1792     | 0.1526     |
|                                                          | seed9              | 0.4838     | 0.3098     | 0.2266     | 0.1768     | 0.1353     |
|                                                          | seed10             | 0.5215     | 0.3565     | 0.2607     | 0.1844     | 0.1617     |
|                                                          | Average            | 0.48554    | 0.32568    | 0.24325    | 0.18583    | 0.15727    |
|                                                          | Standard deviation | 0.02755649 | 0.02079989 | 0.03551907 | 0.01570643 | 0.01682255 |

**Table S2.** Normalized Intensity observed at different depths for all seeds in *C. annuum* cv. PR Ppareum group.

| Normalized Intensity Observed at different depths (a.u.) |            |                         |            |            |            |      |
|----------------------------------------------------------|------------|-------------------------|------------|------------|------------|------|
|                                                          |            | Depth ( $\mu\text{m}$ ) |            |            |            |      |
|                                                          |            | 100                     | 200        | 300        | 400        | 500  |
|                                                          |            | <b>seed1</b>            | 0.69       | 0.5267     | 0.4366     | 0.36 |
| <b>seed2</b>                                             | 0.7321     | 0.5568                  | 0.4484     | 0.3745     | 0.3314     |      |
| <b>seed3</b>                                             | 0.6953     | 0.5404                  | 0.4577     | 0.3763     | 0.324      |      |
| <b>seed4</b>                                             | 0.7131     | 0.5501                  | 0.4478     | 0.3798     | 0.3228     |      |
| <b>seed5</b>                                             | 0.7088     | 0.5429                  | 0.4394     | 0.3711     | 0.3377     |      |
| <b>seed6</b>                                             | 0.6948     | 0.5309                  | 0.4318     | 0.3554     | 0.3074     |      |
| <b>seed7</b>                                             | 0.6707     | 0.5167                  | 0.4281     | 0.3604     | 0.3386     |      |
| <b>seed8</b>                                             | 0.6832     | 0.5325                  | 0.4377     | 0.3696     | 0.3246     |      |
| <b>seed9</b>                                             | 0.7051     | 0.5363                  | 0.4376     | 0.3673     | 0.3124     |      |
| <b>seed10</b>                                            | 0.6886     | 0.5255                  | 0.4155     | 0.3566     | 0.3026     |      |
| <b>Average</b>                                           | 0.69817    | 0.53588                 | 0.43806    | 0.3671     | 0.32165    |      |
| <b>Standard deviation</b>                                | 0.01640671 | 0.01142741              | 0.01113159 | 0.00815733 | 0.01162439 |      |

**Table S3.** Normalized Intensity observed at different depths for all seeds in *C. annuum* cv. PR Yeol group.

| Normalized Intensity Observed at different depths (a.u.) |            |                         |            |            |            |       |
|----------------------------------------------------------|------------|-------------------------|------------|------------|------------|-------|
|                                                          |            | Depth ( $\mu\text{m}$ ) |            |            |            |       |
|                                                          |            | 100                     | 200        | 300        | 400        | 500   |
|                                                          |            | <b>seed1</b>            | 0.636      | 0.4894     | 0.4033     | 0.327 |
| <b>seed2</b>                                             | 0.6433     | 0.4809                  | 0.4069     | 0.3356     | 0.2667     |       |
| <b>seed3</b>                                             | 0.6817     | 0.472                   | 0.3964     | 0.3288     | 0.2735     |       |
| <b>seed4</b>                                             | 0.6527     | 0.5007                  | 0.401      | 0.3362     | 0.2621     |       |
| <b>seed5</b>                                             | 0.6448     | 0.4841                  | 0.4004     | 0.3283     | 0.2697     |       |
| <b>seed6</b>                                             | 0.6845     | 0.5034                  | 0.3877     | 0.3195     | 0.2611     |       |
| <b>seed7</b>                                             | 0.6697     | 0.4797                  | 0.3898     | 0.3334     | 0.2721     |       |
| <b>seed8</b>                                             | 0.6944     | 0.5467                  | 0.4662     | 0.384      | 0.333      |       |
| <b>seed9</b>                                             | 0.6953     | 0.5544                  | 0.4725     | 0.4006     | 0.363      |       |
| <b>seed10</b>                                            | 0.7001     | 0.5412                  | 0.4563     | 0.3784     | 0.3137     |       |
| <b>Average</b>                                           | 0.67025    | 0.50525                 | 0.41805    | 0.34718    | 0.29025    |       |
| <b>Standard deviation</b>                                | 0.02300279 | 0.02915508              | 0.03142977 | 0.02737944 | 0.03302436 |       |

**Table S4.** Normalized Intensity observed at different depths for all seeds in *C. annuum* cv. Asia Jeombo group.

| Normalized Intensity Observed at different depths (a.u.) |                           |                         |            |            |            |            |
|----------------------------------------------------------|---------------------------|-------------------------|------------|------------|------------|------------|
|                                                          |                           | Depth ( $\mu\text{m}$ ) |            |            |            |            |
|                                                          |                           | 100                     | 200        | 300        | 400        | 500        |
| <b>C. annuum cv. Asia Jeombo</b>                         | <b>seed1</b>              | 0.6113                  | 0.4433     | 0.3664     | 0.2965     | 0.23       |
|                                                          | <b>seed2</b>              | 0.5979                  | 0.454      | 0.341      | 0.2622     | 0.2153     |
|                                                          | <b>seed3</b>              | 0.6898                  | 0.5378     | 0.4733     | 0.3983     | 0.3394     |
|                                                          | <b>seed4</b>              | 0.615                   | 0.469      | 0.3575     | 0.2924     | 0.2425     |
|                                                          | <b>seed5</b>              | 0.6329                  | 0.4774     | 0.406      | 0.3325     | 0.2687     |
|                                                          | <b>seed6</b>              | 0.6457                  | 0.466      | 0.373      | 0.2943     | 0.2366     |
|                                                          | <b>seed7</b>              | 0.631                   | 0.4861     | 0.3873     | 0.3052     | 0.2647     |
|                                                          | <b>seed8</b>              | 0.6299                  | 0.4467     | 0.3549     | 0.3036     | 0.2464     |
|                                                          | <b>seed9</b>              | 0.587                   | 0.463      | 0.3975     | 0.3209     | 0.2646     |
|                                                          | <b>seed10</b>             | 0.6653                  | 0.5034     | 0.3832     | 0.3074     | 0.2532     |
|                                                          | <b>Average</b>            | 0.63058                 | 0.47467    | 0.38401    | 0.31133    | 0.25614    |
|                                                          | <b>Standard deviation</b> | 0.02920407              | 0.02717731 | 0.03532858 | 0.03390923 | 0.03202718 |
